# Supplementary figures and images for: A neurobiological pathway to smoking in adolescence: TTC12-ANKK1-DRD2 variants and reward response
Source: PubMed Central journal article supplement — Eur Neuropsychopharmacol. 2018 Oct;28(10):1103–14. doi: 10.1016/j.euroneuro.2018.07.101 (PMC6525784; doi:10.1016/j.euroneuro.2018.07.101), 2018-10

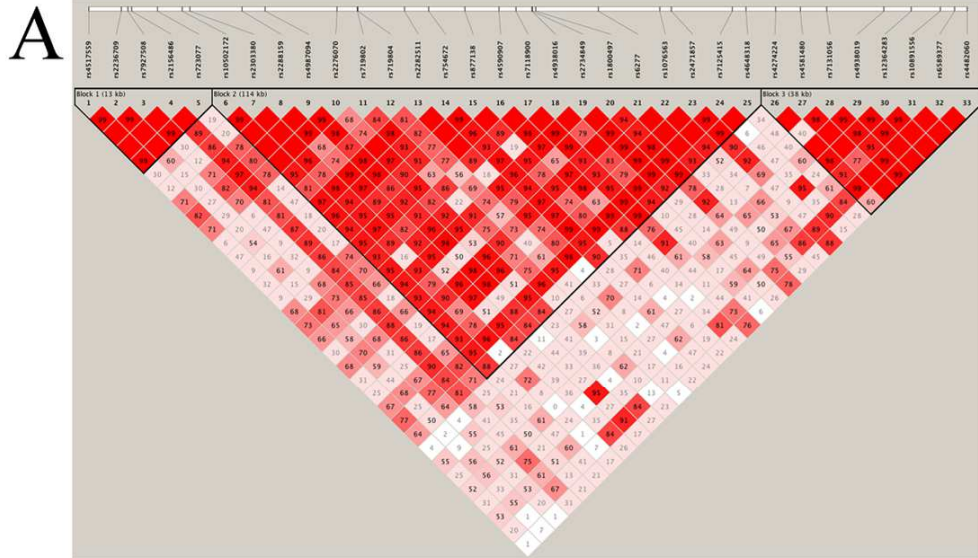

NFBC1966

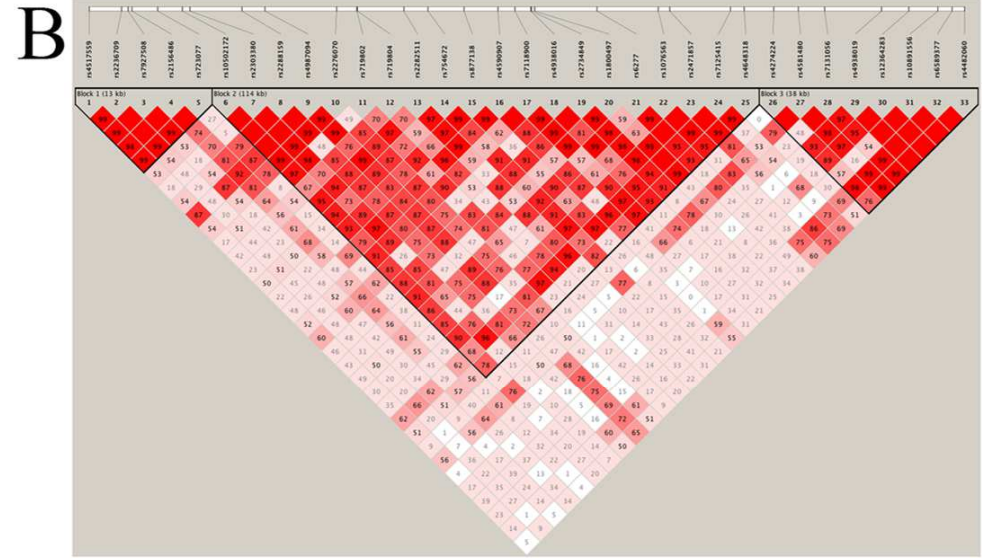

ALSPAC

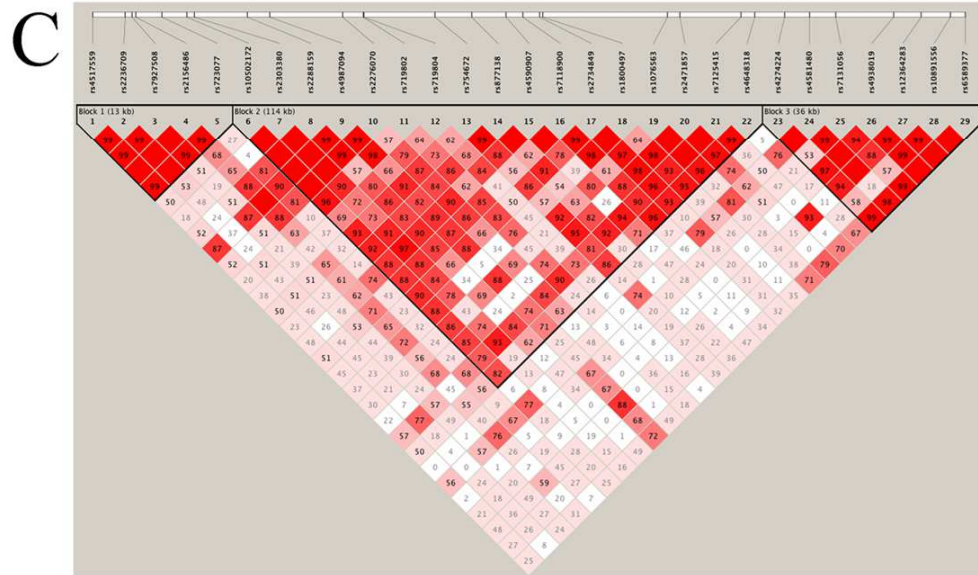

IMAGEN

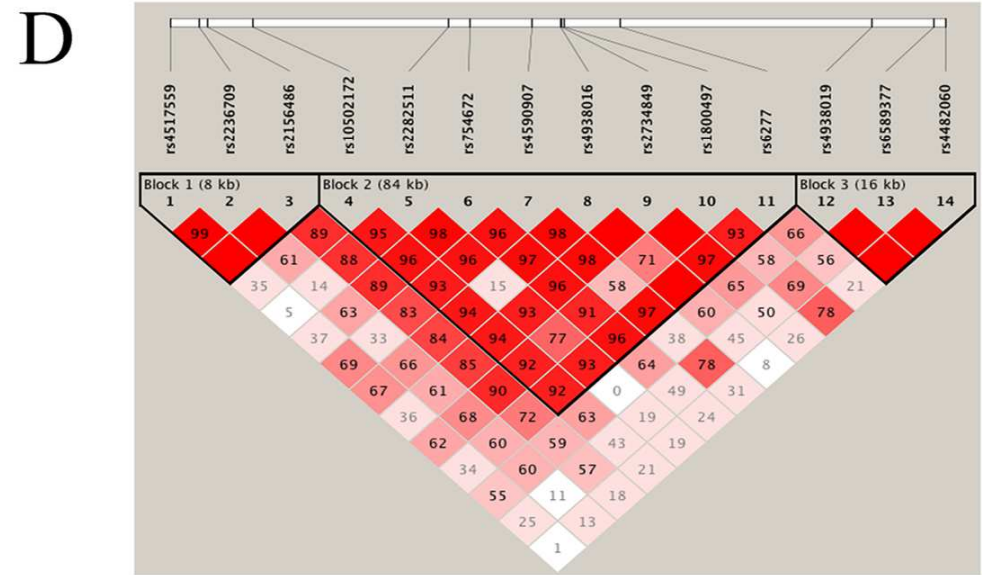

NFBC1986

Supplement: mmc2.pdf [file mmc2.pdf]

**A**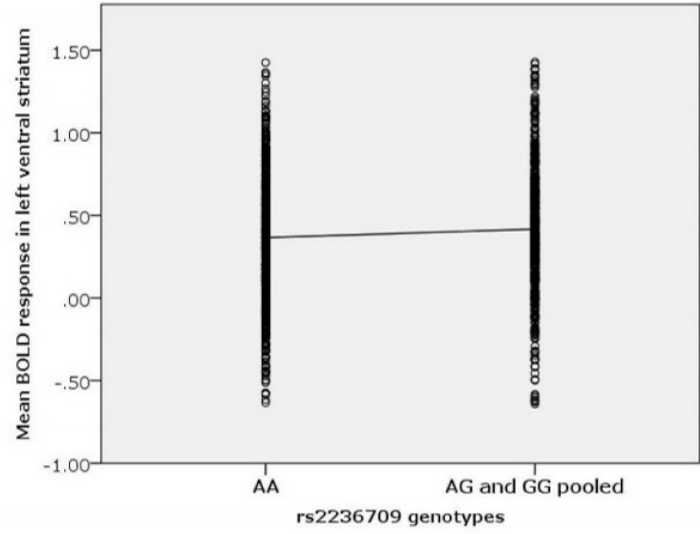**B**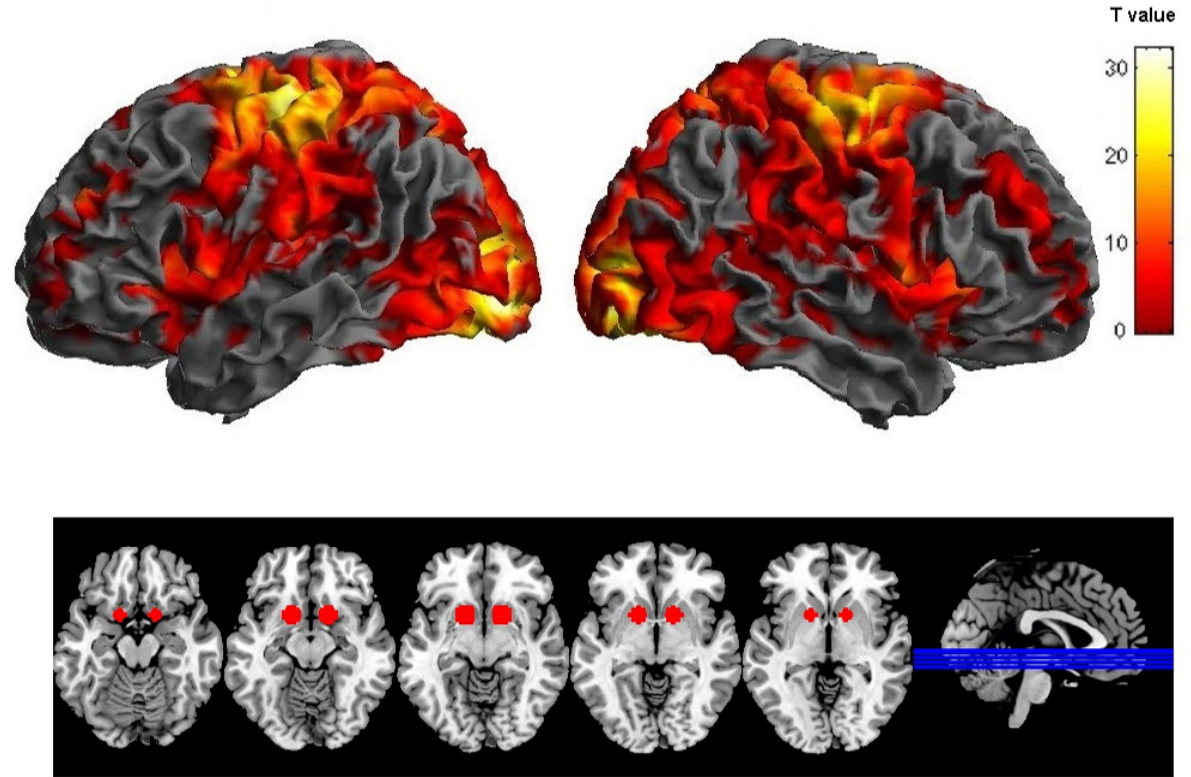

Supplement: mmc3.pdf [file mmc3.pdf]
